# Supplementary material for: Gene therapy rescues disease phenotype in a spinal muscular atrophy with respiratory distress type 1 (SMARD1) mouse model
Source: PubMed Central journal article supplement — Sci Adv. 2015 Mar 13;1(2):e1500078. doi: 10.1126/sciadv.1500078 (PMC4643829; doi:10.1126/sciadv.1500078), 2015-03-13
Supplement: 1500078_SM.pdf [file 1500078_SM.pdf]

## Supplementary Materials for

### Gene therapy rescues disease phenotype in a spinal muscular atrophy with respiratory distress type 1 (SMARD1) mouse model

Monica Nizzardo,\* Chiara Simone, Federica Rizzo, Sabrina Salani, Sara Dametti, Paola Rinchetti, Roberto Del Bo, Kevin Foust, Brian Kaspar, Nereo Bresolin, Giacomo P. Comi, Stefania Corti

Published 13 March 2015, *Sci. Adv.* **1**, e1500078 (2015)  
DOI: 10.1126/sciadv.1500078

#### The PDF file includes:

Fig. S1. Validation of *IGHMBP2* constructs in vitro and in vivo.  
Fig. S2. AAV9-*IGHMBP2* administration ameliorates SMARD1 cardiomyopathy.  
Legend for movie S1

**Other Supplementary Material for this manuscript includes the following:**  
(available at [www.advances.sciencemag.org/cgi/content/full/1/2/e1500078/DC1](http://www.advances.sciencemag.org/cgi/content/full/1/2/e1500078/DC1))

Movie S1 (.mp4 format). Gross appearance of an AAV9-*IGHMBP2*-treated *nmd* mouse.

**Supplementary Fig. S1. Validation of *IGHMBP2* constructs in vitro and in vivo.**

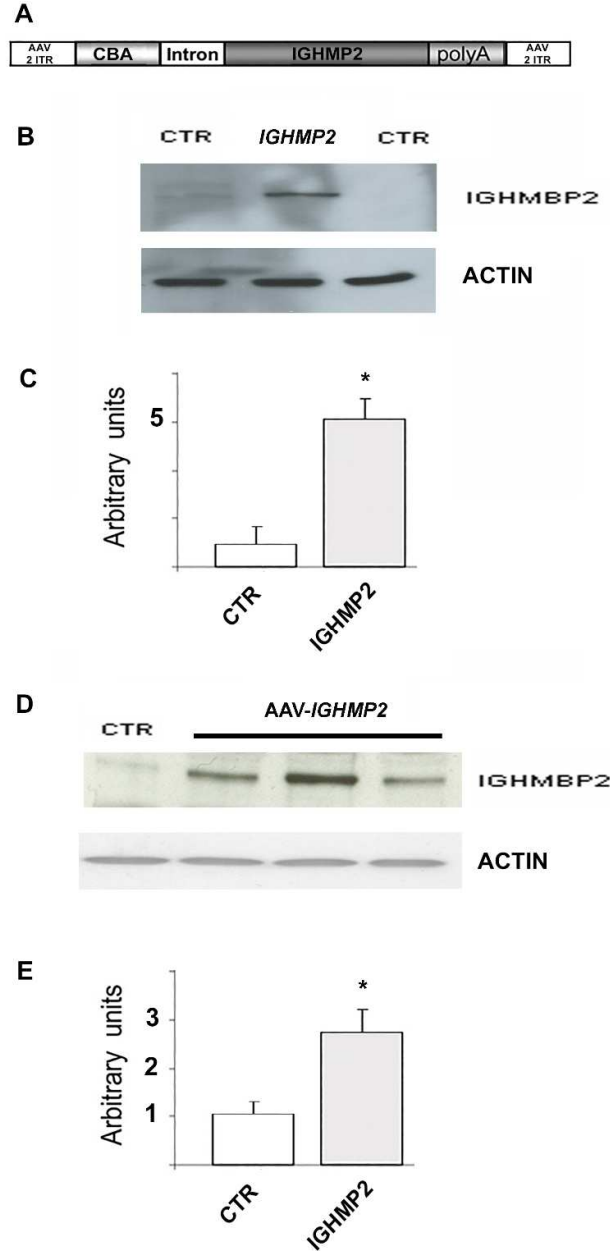

(A) Schematic of the designed plasmid. pAAV-*IGHMBP2*: plasmid carrying *IGHMBP2* and a chimeric intron placed downstream of the CBA promoter. AAV2 inverted terminal repeats appear in flanking positions. (B) Western blot of *IGHMBP2* expression 3 days after transfection of HEK293 cells with the plasmid. *IGHMBP2* levels were normalized to  $\beta$ -actin levels. (C) Quantification of *IGHMBP2* levels in transfected HEK293 cells with respect to untransfected cells. Values are mean  $\pm$  SEM of *IGHMBP2*: $\beta$ -actin expression levels ( $n = 3$ ,  $*P < 0.01$ ). (D) Two weeks after the injection of  $1 \times 10^{10}$  vg AAV9-*IGHMBP2* into the gastrocnemius muscle of C57BL/6 mice, *IGHMBP2* levels were detected by western blotting. (E) Quantification of *IGHMBP2* levels in AAV9-*IGHMBP2*-injected gastrocnemius muscle compared to uninjected muscle. Values are mean  $\pm$  SEM of *IGHMBP2*: $\beta$ -actin expression levels ( $n = 3$ ,  $*P < 0.01$ ).

**Supplementary Fig. S2. AAV9-IGHMBP2 administration ameliorates SMARD1 cardiomyopathy.**

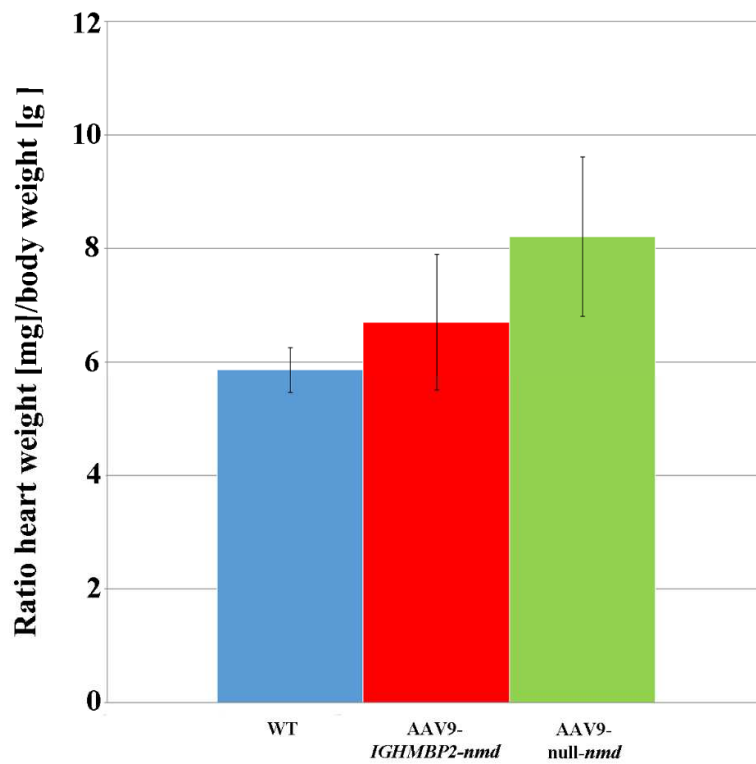

Heart weight (mg) to body weight (g) ratios were increased in AAV9-null-*nmd* mice; these ratios decreased after AAV9-IGHMBP2 treatment ( $P = 0.1$ , ANOVA).

**Supplementary Movie S1. Gross appearance of an AAV9-*IGHMBP2*–treated *nmd* mouse.**

Note the rescued phenotype and locomotor abilities of AAV-*IGHMBP2* *nmd* mouse (the mouse with a larger size) versus the AAV9-null treated *nmd* mouse (the small mouse).
